# Supplementary material for: Superior and stable ferroelectric properties of hafnium-zirconium-oxide thin films deposited via atomic layer deposition using cyclopentadienyl-based precursors without annealing
Source: Royal Society of Chemistry journal article supplement (doi:10.1039/d1nr01535d), 2021-01-01
Supplement: d1nr01535d1.pdf [file d1nr01535d1.pdf]

# Supporting Information

## Superior and Stable Ferroelectric Properties of Hafnium-Zirconium-Oxide Thin Films Deposited via Atomic Layer Deposition using Cyclopentadienyl-Based Precursors without Annealing

Hyo-Bae Kim <sup>a,∇</sup>, Moonyoung Jung <sup>b,∇</sup>, Youkyoung Oh <sup>a</sup>, Seung-Won Lee <sup>a</sup>, Dongseok Suh <sup>b,\*</sup>, Ji-  
Hoon Ahn <sup>a,\*</sup>

<sup>a</sup>*Department of Materials Science and Chemical Engineering, Hanyang University, 55  
Hanyangdaehak-ro, Sangnok-gu, Ansan 15588, Gyeonggi-do, Republic of Korea*

<sup>b</sup>*Department of Energy Science, Sungkyunkwan University, Suwon 16419, Republic of Korea*

\*Corresponding authors: Prof. Ji-Hoon Ahn ([ajh1820@hanyang.ac.kr](mailto:ajh1820@hanyang.ac.kr)) and Prof. Dongseok Suh  
([energy.suh@skku.edu](mailto:energy.suh@skku.edu))

<sup>∇</sup>These authors contributed equally to this work.

## A. Ferroelectric properties of HZO thin films deposited using TEMAHf and TEMAZr

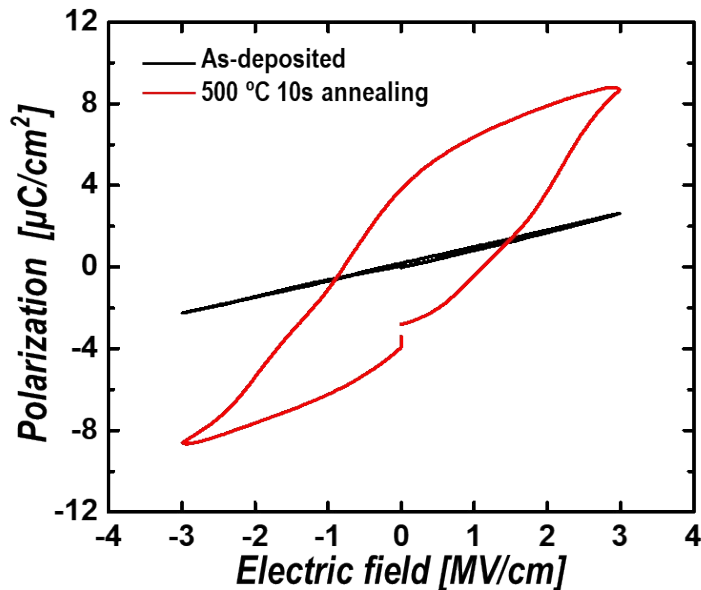

**Fig. S1** Polarization-electric field ( $P$ - $E$ ) curves of HZO thin films deposited at 250 °C using TEMAHf and TEMAZr as precursors.

We investigated the polarization characteristics of HZO thin films deposited using tetrakis(ethylmethyldamido)Zr [TEMAZr] and tetrakis(ethylmethyldamido)Hf [TEMAHf] in the same ALD chamber at 250 °C prior to and after rapid thermal annealing. As shown in Figure S1, the as-deposited HZO thin film did not exhibit ferroelectricity, and a hysteresis loop was observed after post-thermal annealing at 500 °C for 10 s.

**B. Ferroelectric properties of HZO thin films deposited using a Cp-based cocktail precursor with a molar ratio of  $\text{Hf}[\text{Cp}(\text{NMe}_2)_3]:\text{Zr}[\text{Cp}(\text{NMe}_2)_3] = 50:50$ .**

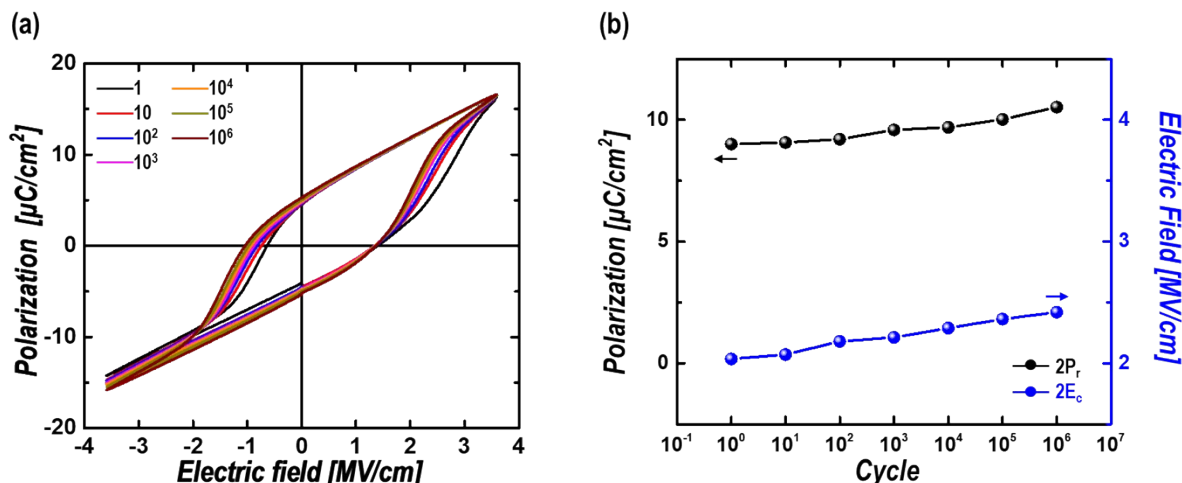

**Fig. S2** Ferroelectric properties of as-deposited HZO thin films deposited using a Cp-based cocktail precursor with a molar ratio  $\text{Hf}[\text{Cp}(\text{NMe}_2)_3]:\text{Zr}[\text{Cp}(\text{NMe}_2)_3] = 50:50$ : (a)  $P$ - $E$  loops of the HZO thin film for the pristine state and the subsequently measured cycles. (b) Variation of the remanent polarization and coercive field as a function of number of cycles measured at an applied electric field of 3.5 MV/cm.

To compare the cocktail precursor composed of a molar ratio of  $\text{Hf}[\text{Cp}(\text{NMe}_2)_3]:\text{Zr}[\text{Cp}(\text{NMe}_2)_3] = 35:65$ , we additionally investigated the ferroelectric properties of a HZO thin film deposited at 320 °C using a cocktail precursor with a molar ratio of 1:1 without post-annealing. Even in this case, ferroelectric loops were observed without annealing; however, the  $2P_r$  value ( $\sim 10 \mu\text{C}/\text{cm}^2$ ) was relatively small.

**C. Electrical properties of HZO thin films deposited using a Cp-based cocktail precursor with a molar ratio of  $\text{Hf}[\text{Cp}(\text{NMe}_2)_3]:\text{Zr}[\text{Cp}(\text{NMe}_2)_3] = 35:65$ .**

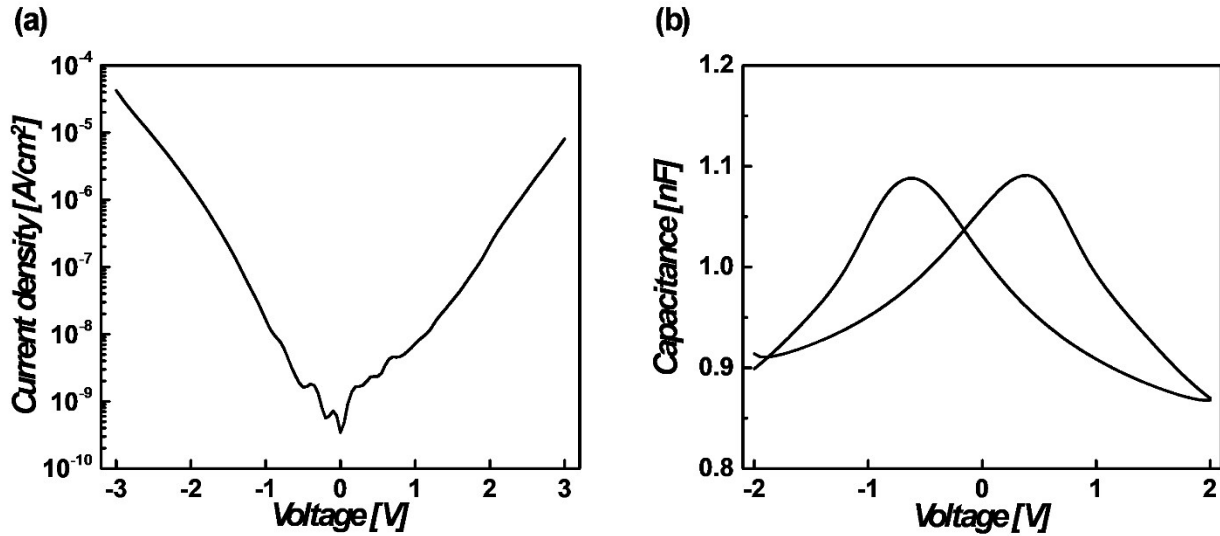

**Fig. S3** Electrical properties of HZO thin films deposited using a Cp-based cocktail precursor with a molar ratio of  $\text{Hf}[\text{Cp}(\text{NMe}_2)_3]:\text{Zr}[\text{Cp}(\text{NMe}_2)_3] = 35:65$ : (a) current density-voltage(J-V) curve of the 10-nm-thick HZO thin film. (b) capacitance-voltage(C-V) curve of the 10-nm-thick HZO thin film measured at 100kHz.

We investigated the electrical characteristics of HZO thin films deposited using a Cp-based cocktail precursor with a molar ratio of  $\text{Hf}[\text{Cp}(\text{NMe}_2)_3]:\text{Zr}[\text{Cp}(\text{NMe}_2)_3] = 35:65$ . As shown in Figure S3(a) and (b), the as-deposited HZO based MFM capacitors exhibited good leakage current properties, and a typical C-V butterfly-like curve, characteristics of ferroelectric capacitors, also observed.

**D. Schematic diagram for applied pulse for endurance switching cycle test.**

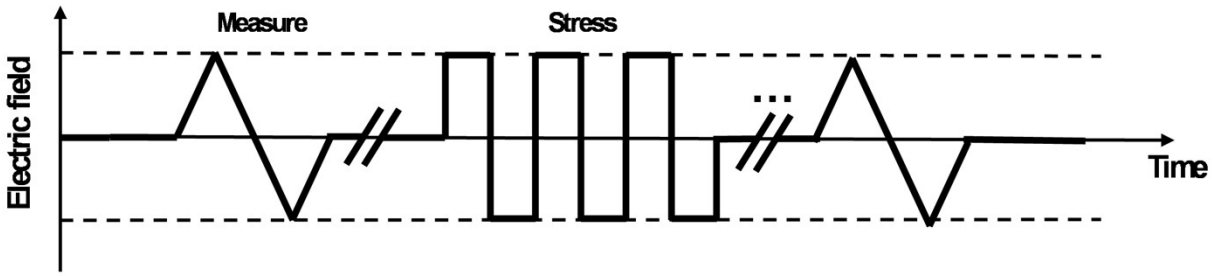

|           | Voltage | Rising time    | Pulse width | Termination |
|-----------|---------|----------------|-------------|-------------|
| P-E       | 3.5V    | 1kHz frequency | Sine wave   | 50Ω         |
| Endurance |         | 20ns           | 5μs         |             |

**Fig. S4** Schematic diagram for applied pulse used to measure P-E endurance switching cycle.

Referring to the previous paper,<sup>S1, S2</sup> we conducted the P-E endurance switching cycle measurement with the following waveforms. In the measure section, a 1 kHz triangle wave field was used as in general P-E measurement. In stress section, rectangular wave field with a pulse width of 5 μs and rising/falling time of 2 ns were utilized to switching cycle.

E. Schematics of the transient measurement circuit diagram and HZO-based FeFET.

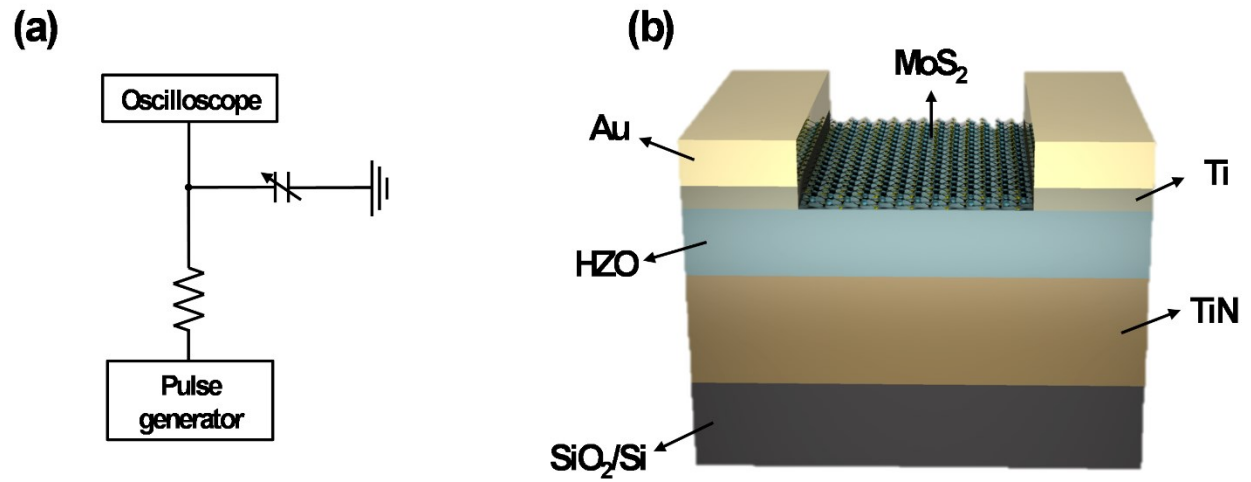

## References

S1. S. Starschich, S. Menzel and U. Böttger, *Appl. Phys. Lett.*, 2016, 108, 032903.

S2. T. Schenk, U. Schroeder, M. Pešić, M. Popovici, Y. V. Pershin and T. Mikolajick, *ACS Appl. Mater. Interfaces*, 2014, 6, 19744-19751.
